# Supplementary material for: Receptor-templated stapling of intrinsically disordered peptide ligands
Source: Royal Society of Chemistry journal article supplement (doi:10.1039/c5ob00269a), 2015-01-01
Supplement: c5ob00269a1.pdf [file c5ob00269a1.pdf]

## Receptor-Templated Stapling of Intrinsically Disordered Peptide Ligands

Conor M. Haney and W. Seth Horne\*

*Department of Chemistry, University of Pittsburgh, Pittsburgh, PA 15260*

### Supporting Information

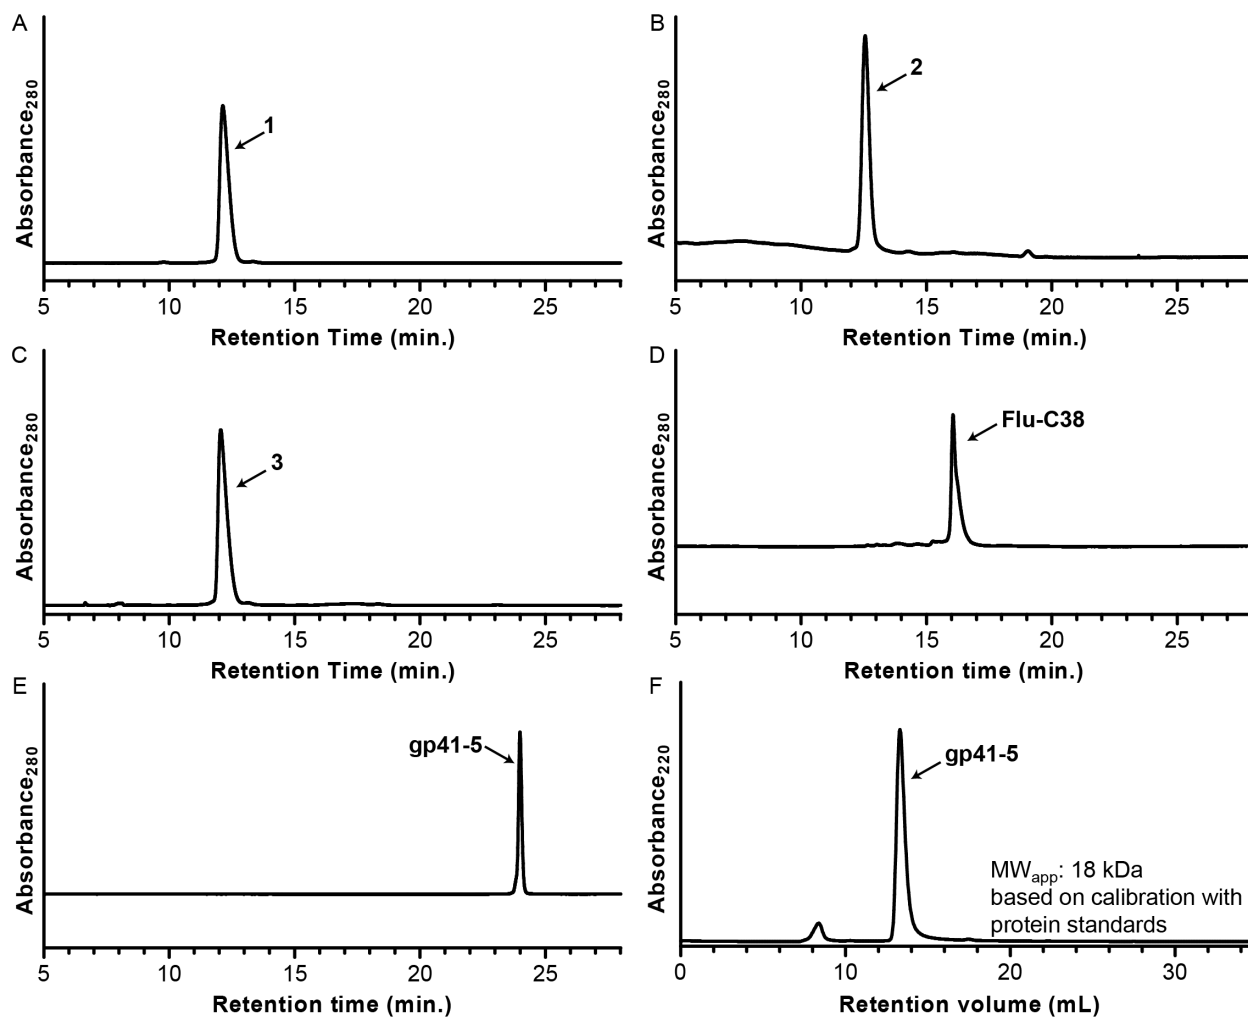

**Figure S1.** Chromatograms of purified peptides **1-3**, Flu-C38, and gp41-5. (A-E) HPLC chromatograms of peptides **1-3** (A-C, respectively), Flu-C38 (D) and gp41-5 (E). (F) Analytical GPC chromatogram of refolded gp41-5. Calculated molecular weight based on calibration with protein standards.

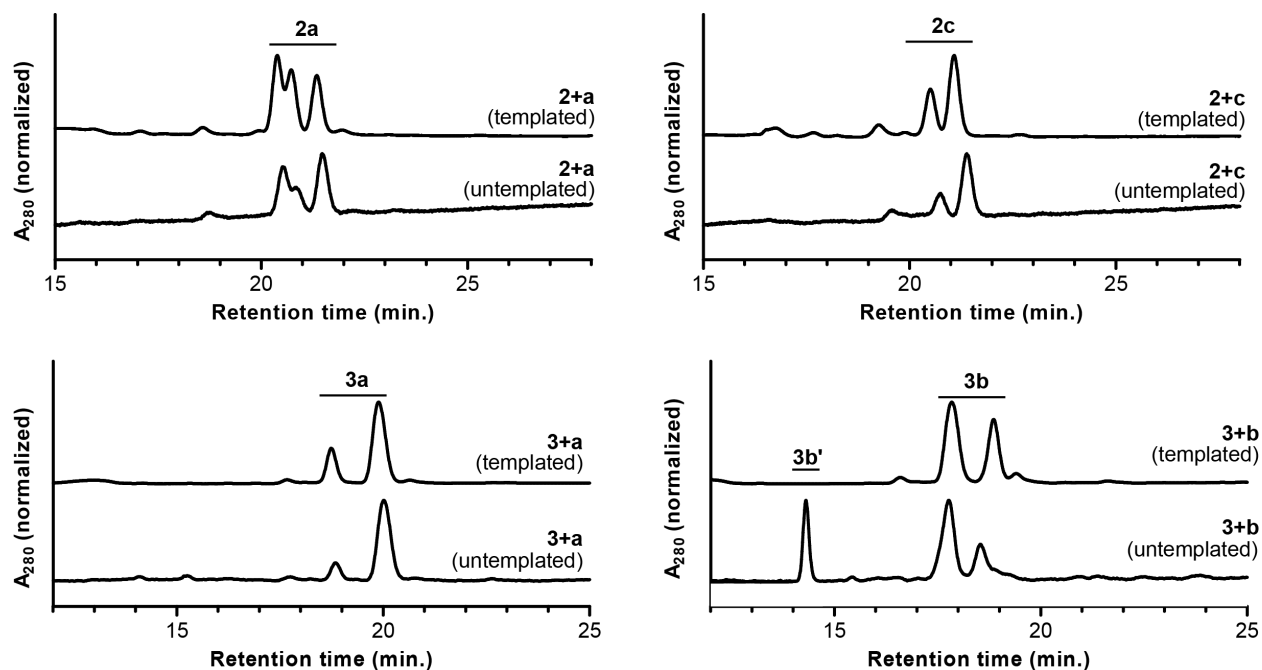

**Figure S2.** HPLC chromatograms of peptide stapling reactions carried out in the presence (“templated”) or absence (“untemplated”) of the gp41-5 protein receptor. Each reaction consists of 10  $\mu$ M peptide, 40  $\mu$ M linker, and 10  $\mu$ M gp41-5 (if present) in pH 7 phosphate buffer.

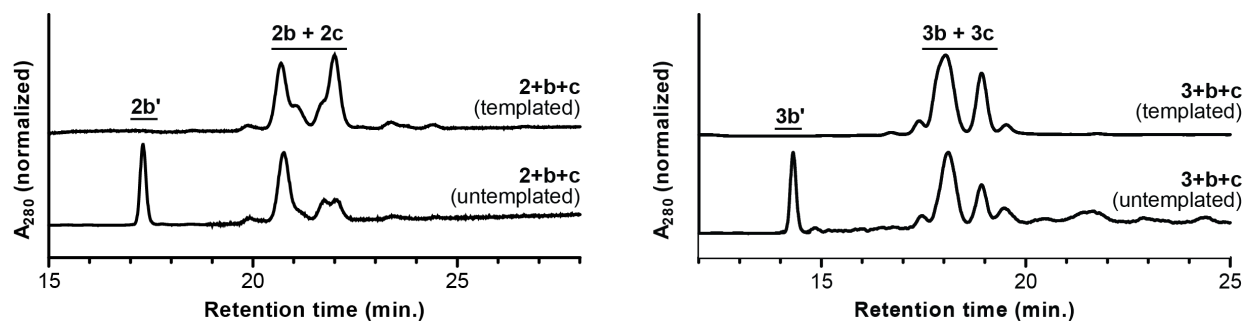

**Figure S3.** HPLC chromatograms of peptide stapling reactions carried out in the presence (“templated”) or absence (“untemplated”) of the gp41-5 protein receptor. Each reaction consists of 10  $\mu$ M peptide, 40  $\mu$ M each linker (**b** and **c**), and 10  $\mu$ M gp41-5 (if present) in pH 7 phosphate buffer.

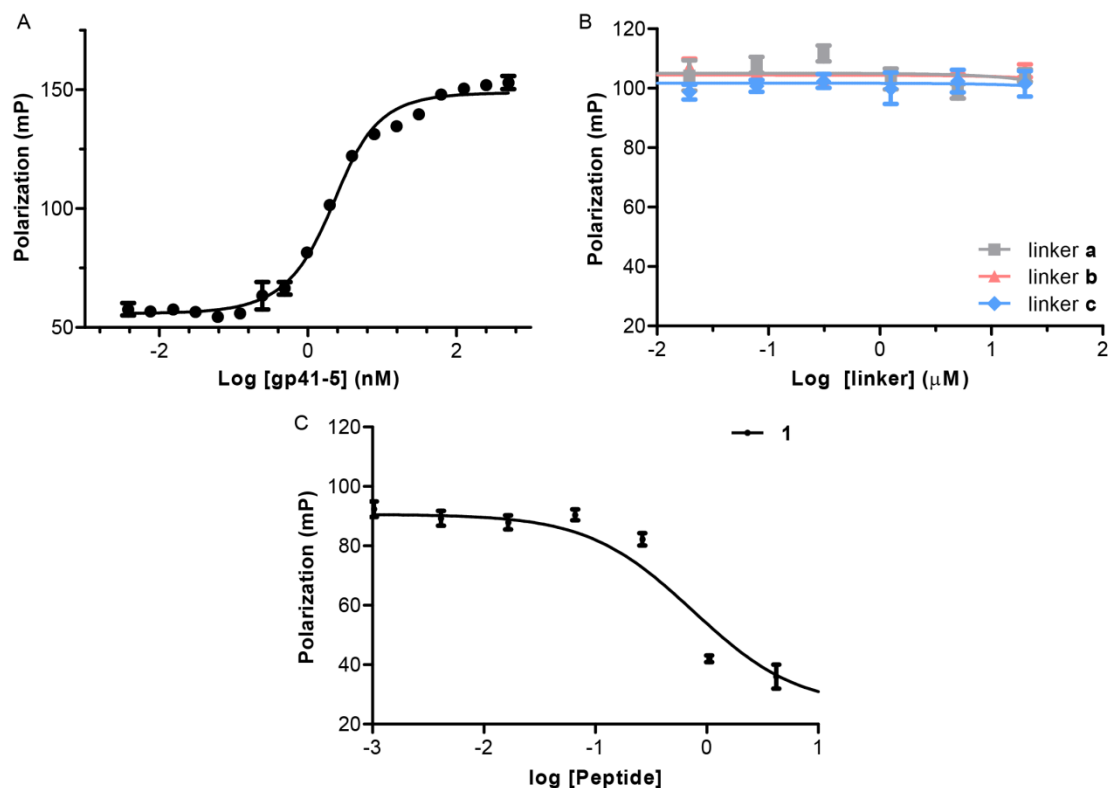

**Figure S4.** Fluorescence polarization curves. (A) Direct binding fluorescence polarization assay showing titration of gp41-5 into 2 nM Flu-C38. (B) Fluorescence polarization (FP) inhibition of the interaction between Flu-C38 and gp41-5 by linkers **a-c**. No disruption of the binding interaction is observed. (C) Fluorescence polarization (FP) inhibition curve for peptide **1** competitively displacing Flu-C38 from the gp41-5 receptor.

**Table S1.** MALDI-TOF Data for peptides **1-3**, their cyclic products, protein gp41-5, and Flu-C38.

| Peptide    | $[M+H]^+$ ( $m/z$ )  |                      |
|------------|----------------------|----------------------|
|            | Calculated           | Observed             |
| <b>1</b>   | 2812.5               | 2812.3               |
| <b>2</b>   | 2816.5               | 2816.5               |
| <b>2a</b>  | 2914.5               | 2914.6               |
| <b>2b</b>  | 2914.5               | 2914.7               |
| <b>2b'</b> | 2932.5               | 2932.7*              |
| <b>2c</b>  | 2920.4               | 2920.2               |
| <b>3</b>   | 2816.5               | 2816.3               |
| <b>3a</b>  | 2914.5               | 2914.8               |
| <b>3b</b>  | 2914.5               | 2914.2               |
| <b>3b'</b> | 2932.5               | 2932.8*              |
| <b>3c</b>  | 2920.4               | 2920.5               |
| gp41-5     | 22228.7 <sup>†</sup> | 22232.1 <sup>†</sup> |
| Flu-C38    | 5089.3               | 5089.5               |

\*Second species observed at 2949.5.

<sup>†</sup>Calculated and observed average  $[M+H]^+$  masses
